# Supplementary material for: Stent-in-stent technique under fluoroscopy for removal of embedded esophageal stent
Source: Research Square preprint supplement (doi:10.21203/rs.3.rs-332029/v1), 2021-03-23
Supplement: Supplementary file 1 [file 190983e89f6d9991f4d8b71a.docx]

| Patient | Sex | Age, years | Reason for stent placement | Time taken for stent removal, （minutes） | Indwelling time of the first stent, days | Indwelling time of the second stent, days |
| --- | --- | --- | --- | --- | --- | --- |
| 1 | F | 90 | Benign stenosis | 30 | 1119 | 495 |
| 2 | F | 90 | Benign stenosis | 8 | 495 | 51 |
| 3 | M | 71 | Anastomotic stenosis (after esophageal cancer surgery) | 10 | 1154 | 24 |
| 4 | M | 63 | Esophagotracheal fistula (after esophageal cancer surgery) | 7 | 516 | 119 |
| 5 | F | 54 | Esophagotracheal fistula (after esophageal cancer surgery) | 15 | 591 | 475 |
| 6 | F | 54 | Esophagotracheal fistula (after esophageal cancer surgery) | 15 | 475 | 11 |
| 7 | M | 78 | Esophagotracheal fistula (after esophageal cancer surgery) | 47 | 1473 | 9 |
| 8 | M | 64 | Anastomotic stenosis (after esophageal cancer surgery) | 23 | 407 | 17 |
| 9 | M | 72 | Anastomotic stenosis (after esophageal cancer surgery) | 28 | 428 | 4 |
| 10 | F | 54 | Benign stenosis | 10 | 151 | 28 |
| 11 | F | 48 | Anastomotic stenosis (following corrosive injury) | 10 | 271 | 21 |
| 12 | M | 70 | Anastomotic stenosis (after esophageal cancer surgery) | 7 | 770 | 32 |
| 13 | M | 65 | Anastomotic stenosis (after esophageal cancer surgery) | 8 | 400 | 64 |
| 14 | F | 70 | Benign stenosis | 11 | 505 | 39 |
| 15 | M | 66 | Anastomotic stenosis (after esophageal cancer surgery) | 14 | 392 | 29 |

Table 1 Clinical characteristics of the patients

F, female; M, male.
